# Supplementary material
Source: PubMed Central journal article supplement (PMC7805021)
Supplement: NIHMS1657059-supplement-1.pdf [file NIHMS1657059-supplement-1.pdf]

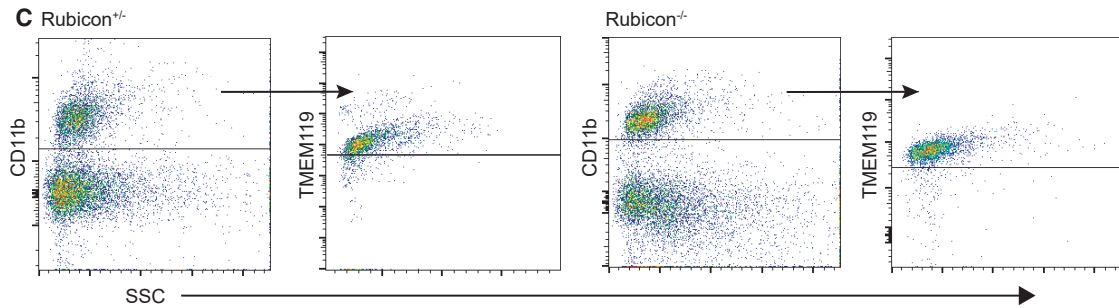

Figure S5. Analysis of Infiltrating Monocytes versus Resident Microglia in 5xFAD Rubicon-Deficient Mice (corrected)

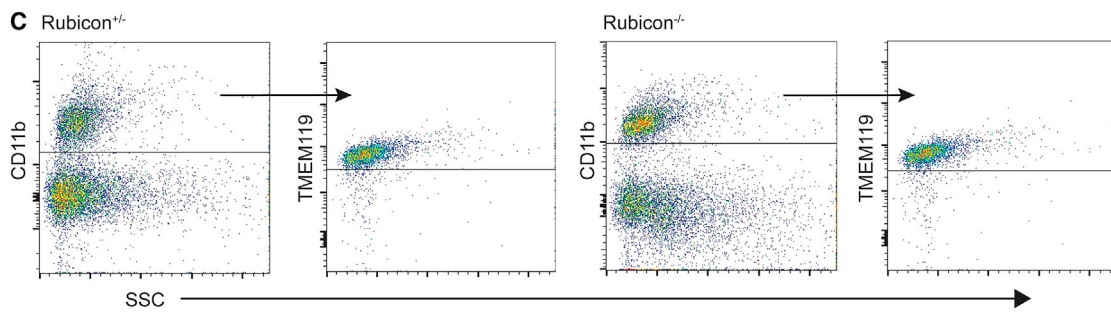

Figure S5. Analysis of Infiltrating Monocytes versus Resident Microglia in 5xFAD Rubicon-Deficient Mice (original)
